# Supplementary material for: Women's Education Level, Maternal Health Facilities, Abortion Legislation and Maternal Deaths: A Natural Experiment in Chile from 1957 to 2007
Source: PLOS journal article supplement (doi:10.1371/journal.pone.0036613), 2012-05-04
Supplement: S8 (10.1371/journal.pone.0036613.s008) [file journal.pone.0036613.s008]

**Table S2.** International Classification of Diseases (ICD) 7<sup>th</sup> version for classifying maternal death causes in Chile.

| Group List A<br>ICD-7                                                                                            | ICD-7 <sup>‡</sup><br>(1957-1967) | Causes of death                                                           |
|------------------------------------------------------------------------------------------------------------------|-----------------------------------|---------------------------------------------------------------------------|
| Sepsis of pregnancy, childbirth and the puerperium (A115)                                                        | 640                               | Pyelitis and pyelonephritis of pregnancy                                  |
|                                                                                                                  | 641                               | Other infections of genito-urinary tract during pregnancy                 |
|                                                                                                                  | 681                               | Sepsis of childbirth and the puerperium                                   |
|                                                                                                                  | 682                               | Puerperal phlebitis and thrombosis                                        |
|                                                                                                                  | 684                               | Puerperal pulmonary embolism                                              |
| Toxaemias of pregnancy and the puerperium (A116)                                                                 | 642                               | Toxaemias of pregnancy                                                    |
|                                                                                                                  | 652                               | Abortion with toxaemia, without mention of sepsis                         |
|                                                                                                                  | 685                               | Puerperal eclampsia                                                       |
|                                                                                                                  | 686                               | Other forms of puerperal toxaemia                                         |
| Haemorrhage of pregnancy and childbirth (A117)                                                                   | 643                               | Placenta praevia                                                          |
|                                                                                                                  | 644                               | Other haemorrhage of pregnancy                                            |
|                                                                                                                  | 670                               | Delivery complicated by placenta praevia or antepartum haemorrhage        |
|                                                                                                                  | 671                               | Delivery complicated by retained placenta                                 |
|                                                                                                                  | 672                               | Delivery complicated by other postpartum haemorrhage                      |
| Abortion with and without mention of sepsis or toxaemia (A118 and A119)                                          | 650                               | Abortion without mention of sepsis or toxaemia                            |
|                                                                                                                  | 651                               | Abortion with sepsis                                                      |
| Other complications of pregnancy, childbirth and the puerperium. Delivery without mention of complication (A120) | 645                               | Ectopic pregnancy                                                         |
|                                                                                                                  | 646                               | Anaemia of pregnancy                                                      |
|                                                                                                                  | 647                               | Pregnancy with malposition of foetus in uterus                            |
|                                                                                                                  | 648                               | Other complications arising from pregnancy                                |
|                                                                                                                  | 649                               | Pregnancy associated with other conditions                                |
|                                                                                                                  | 660                               | Delivery without mention of complication                                  |
|                                                                                                                  | 673                               | Delivery complicated by abnormality of bony pelvis                        |
|                                                                                                                  | 674                               | Delivery complicated by disproportion or malposition of foetus            |
|                                                                                                                  | 675                               | Delivery complicated by prolonged labour of other origin                  |
|                                                                                                                  | 676                               | Delivery with laceration of perineum, without mention of other laceration |
|                                                                                                                  | 677                               | Delivery with other trauma                                                |
|                                                                                                                  | 678                               | Delivery with other complications of childbirth                           |
|                                                                                                                  | 680                               | Puerperal urinary infection without other sepsis                          |
|                                                                                                                  | 683                               | Pyrexia of unknown origin during the puerperium                           |
|                                                                                                                  | 687                               | Cerebral haemorrhage in the puerperium                                    |
|                                                                                                                  | 688                               | Other and unspecified complications of the puerperium                     |
|                                                                                                                  | 689                               | Mastitis and other disorders of lactation                                 |

<sup>†</sup> Group names are based on the content of the ICD-7, list A (Intermediate list of 150 causes for tabulation of morbidity and mortality).

<sup>‡</sup> During 1957 the ICD-6 was used in Chile, but maternal causes of death were directly homologated with the ICD-7.
