# Supplementary material for: Women's Education Level, Maternal Health Facilities, Abortion Legislation and Maternal Deaths: A Natural Experiment in Chile from 1957 to 2007
Source: PLOS journal article supplement (doi:10.1371/journal.pone.0036613), 2012-05-04
Supplement: S9 (10.1371/journal.pone.0036613.s009) [file journal.pone.0036613.s009]

**Table S3.** International Classification of Diseases (ICD) 8<sup>th</sup> version for classifying maternal death causes in Chile. Homologation with five groups from ICD 7<sup>th</sup> version, list A.

| Group List A<br>ICD-7†                                                                                           | ICD-8<br>(1968-1979) | Cause of death                                                            |
|------------------------------------------------------------------------------------------------------------------|----------------------|---------------------------------------------------------------------------|
| Sepsis of pregnancy, childbirth and the puerperium (A115)                                                        | 670                  | Sepsis of childbirth and the puerperium                                   |
|                                                                                                                  | 671                  | Puerperal phlebitis and thrombosis                                        |
|                                                                                                                  | 673                  | Puerperal pulmonary embolism                                              |
| Toxaemias of pregnancy and the puerperium (A116)                                                                 | 636                  | Renal disease arising during pregnancy and the puerperium                 |
|                                                                                                                  | 637                  | Pre-eclampsia, eclampsia and toxemia, unspecified                         |
|                                                                                                                  | 638                  | Hyperemesis gravidarum                                                    |
|                                                                                                                  | 639                  | Other toxemias of pregnancy and the puerperium                            |
| Haemorrhage of pregnancy and childbirth (A117)                                                                   | 632                  | Haemorrhage of pregnancy                                                  |
|                                                                                                                  | 651                  | Delivery complicated by placenta praevia or antepartum haemorrhage        |
|                                                                                                                  | 652                  | Delivery complicated by retained placenta                                 |
|                                                                                                                  | 653                  | Delivery complicated by other postpartum haemorrhage                      |
| Abortion with and without mention of sepsis or toxemia (A118 and A119)                                           | 640                  | Abortion induced for medical indications                                  |
|                                                                                                                  | 641                  | Abortion induced for other legal indications                              |
|                                                                                                                  | 642                  | Abortion induced for other reasons                                        |
|                                                                                                                  | 643                  | Spontaneous abortion                                                      |
|                                                                                                                  | 644                  | Abortion not specified as induced or spontaneous                          |
|                                                                                                                  | 645                  | Other abortion                                                            |
| Other complications of pregnancy, childbirth and the puerperium. Delivery without mention of complication (A120) | 630                  | Infections of genital tract during pregnancy                              |
|                                                                                                                  | 631                  | Ectopic pregnancy                                                         |
|                                                                                                                  | 633                  | Anaemia of pregnancy                                                      |
|                                                                                                                  | 634                  | Other complications of pregnancy                                          |
|                                                                                                                  | 635                  | Urinary infections arising during pregnancy and the puerperium            |
|                                                                                                                  | 650                  | Delivery without mention of complication                                  |
|                                                                                                                  | 654                  | Delivery complicated by abnormality of bony pelvis                        |
|                                                                                                                  | 655                  | Delivery complicated by foetopelvic disproportion                         |
|                                                                                                                  | 656                  | Delivery complicated by malpresentation of foetus                         |
|                                                                                                                  | 657                  | Delivery complicated by prolonged labour of other origin                  |
|                                                                                                                  | 658                  | Delivery with laceration of perineum, without mention of other laceration |
|                                                                                                                  | 659                  | Delivery with rupture of uterus                                           |
|                                                                                                                  | 660                  | Delivery with other obstetrical trauma                                    |
|                                                                                                                  | 661                  | Delivery with other complications                                         |
|                                                                                                                  | 662                  | Anaesthetic death in uncomplicated delivery                               |
|                                                                                                                  | 672                  | Pyrexia of unknown origin during the puerperium                           |
|                                                                                                                  | 674                  | Cerebral haemorrhage in the puerperium                                    |
|                                                                                                                  | 675                  | Puerperal blood dyscrasias                                                |
|                                                                                                                  | 676                  | Anaemia of puerperium                                                     |
|                                                                                                                  | 677                  | Other and unspecified complications of the puerperium                     |
|                                                                                                                  | 678                  | Mastitis and other disorders of lactation                                 |

† Group names are based on the content of the ICD-7, list A (Intermediate list of 150 causes for tabulation of morbidity and mortality).
