# Supplementary material for: Women's Education Level, Maternal Health Facilities, Abortion Legislation and Maternal Deaths: A Natural Experiment in Chile from 1957 to 2007
Source: PLOS journal article supplement (doi:10.1371/journal.pone.0036613), 2012-05-04
Supplement: S10 (10.1371/journal.pone.0036613.s010) [file journal.pone.0036613.s010]

**Table S4.** International Classification of Diseases (ICD) 9<sup>th</sup> version for classifying maternal death causes in Chile. Homologation with five groups from ICD 7<sup>th</sup> version, list A.

| Group List A<br>ICD-7†                                                                                           | ICD-9<br>(1980-1996) | Cause of death                                                                                                                    |
|------------------------------------------------------------------------------------------------------------------|----------------------|-----------------------------------------------------------------------------------------------------------------------------------|
| Sepsis of pregnancy, childbirth and the puerperium (A115)                                                        | 670                  | Major puerperal infection                                                                                                         |
|                                                                                                                  | 671                  | Venous complications in pregnancy and the puerperium                                                                              |
|                                                                                                                  | 673                  | Obstetrical pulmonary embolism                                                                                                    |
| Toxaemias of pregnancy and the puerperium (A116)                                                                 | 642                  | Hypertension complicating pregnancy, childbirth and the puerperium                                                                |
| Haemorrhage of pregnancy and childbirth (A117)                                                                   | 640                  | Haemorrhage in early pregnancy                                                                                                    |
|                                                                                                                  | 641                  | Antepartum haemorrhage, abruptio placentae and placenta praevia                                                                   |
|                                                                                                                  | 666                  | Postpartum haemorrhage                                                                                                            |
|                                                                                                                  | 667                  | Retained placenta or membranes, without haemorrhage                                                                               |
| Abortion with and without mention of sepsis or toxemia (A118 and A119)                                           | 632                  | Missed abortion                                                                                                                   |
|                                                                                                                  | 634                  | Spontaneous abortion                                                                                                              |
|                                                                                                                  | 635                  | Legal induced abortion                                                                                                            |
|                                                                                                                  | 636                  | Illegal induced abortion                                                                                                          |
|                                                                                                                  | 637                  | Unspecified abortion                                                                                                              |
|                                                                                                                  | 638                  | Attempted but failed abortion                                                                                                     |
|                                                                                                                  | 639                  | Complications following abortion and ectopic and molar pregnancies                                                                |
| Other complications of pregnancy, childbirth and the puerperium. Delivery without mention of complication (A120) | 630                  | Hydatidiform mole                                                                                                                 |
|                                                                                                                  | 631                  | Other abnormal product of conception                                                                                              |
|                                                                                                                  | 633                  | Ectopic pregnancy                                                                                                                 |
|                                                                                                                  | 643                  | Excessive vomiting in pregnancy                                                                                                   |
|                                                                                                                  | 644                  | Early or threatened labour                                                                                                        |
|                                                                                                                  | 645                  | Prolonged pregnancy                                                                                                               |
|                                                                                                                  | 646                  | Other complications of pregnancy, not elsewhere classified                                                                        |
|                                                                                                                  | 647                  | Infective and parasitic conditions in the mother classifiable elsewhere but complicating pregnancy, childbirth and the puerperium |
|                                                                                                                  | 648                  | Other current conditions in the mother classifiable elsewhere but complicating pregnancy, childbirth and the puerperium           |
|                                                                                                                  | 650                  | Delivery in a completely normal case                                                                                              |
|                                                                                                                  | 651                  | Multiple gestation                                                                                                                |
|                                                                                                                  | 652                  | Malposition and malpresentation of foetus                                                                                         |
|                                                                                                                  | 653                  | Disproportion                                                                                                                     |
|                                                                                                                  | 654                  | Abnormality of organs and soft tissues of pelvis                                                                                  |
|                                                                                                                  | 655                  | Known or suspected foetal abnormality affecting management of mother                                                              |
|                                                                                                                  | 656                  | Other foetal and placental problems affecting management of mother                                                                |
|                                                                                                                  | 657                  | Polyhydramnios                                                                                                                    |
|                                                                                                                  | 658                  | Other problems associated with amniotic cavity and membranes                                                                      |
|                                                                                                                  | 659                  | Other indications for care or intervention related to labour and delivery and not elsewhere classified                            |
|                                                                                                                  | 660                  | Obstructed labour                                                                                                                 |
|                                                                                                                  | 661                  | Abnormality of forces of labour                                                                                                   |
|                                                                                                                  | 662                  | Long labour                                                                                                                       |
|                                                                                                                  | 663                  | Umbilical cord complications                                                                                                      |
|                                                                                                                  | 664                  | Trauma to perineum and vulva during delivery                                                                                      |
|                                                                                                                  | 665                  | Other obstetrical trauma                                                                                                          |
|                                                                                                                  | 668                  | Complications of the administration of anaesthetic or other sedation in labour and delivery                                       |
|                                                                                                                  | 669                  | Other complications of labour and delivery, not elsewhere classified                                                              |
|                                                                                                                  | 672                  | Pyrexia of unknown origin during the puerperium                                                                                   |
|                                                                                                                  | 674                  | Other and unspecified complications of the puerperium, not elsewhere classified                                                   |
|                                                                                                                  | 675                  | Infections of the breast and nipple associated with childbirth                                                                    |
|                                                                                                                  | 676                  | Other disorders of the breast associated with childbirth, and disorders of lactation                                              |
|                                                                                                                  | 677                  | Late effect of complication of pregnancy, childbirth and the puerperium                                                           |

† Group names are based on the content of the ICD-7, list A (Intermediate list of 150 causes for tabulation of morbidity and mortality).
