# Supplementary material for: Women's Education Level, Maternal Health Facilities, Abortion Legislation and Maternal Deaths: A Natural Experiment in Chile from 1957 to 2007
Source: PLOS journal article supplement (doi:10.1371/journal.pone.0036613), 2012-05-04
Supplement: S11 (10.1371/journal.pone.0036613.s011) [file journal.pone.0036613.s011]

**Table S5.** International Classification of Diseases (ICD) 10<sup>th</sup> version for classifying maternal death causes in Chile. Homologation with five groups from ICD 7<sup>th</sup> version, list A.

| Group List A<br>ICD-7†                                                                                           | ICD-10<br>(1997-present) | Causes of death                                                                      |
|------------------------------------------------------------------------------------------------------------------|--------------------------|--------------------------------------------------------------------------------------|
| Sepsis of pregnancy, childbirth and the puerperium (A115)                                                        | O22                      | Venous complications in pregnancy                                                    |
|                                                                                                                  | O23                      | Infections of genitourinary tract in pregnancy.                                      |
|                                                                                                                  | O85                      | Puerperal sepsis                                                                     |
|                                                                                                                  | O86                      | Other puerperal infections                                                           |
|                                                                                                                  | O87                      | Venous complications in the puerperium                                               |
|                                                                                                                  | O88                      | Obstetric embolism                                                                   |
| Toxaemias of pregnancy and the puerperium (A116)                                                                 | O10                      | Pre-existing hypertension complicating pregnancy, childbirth and the puerperium      |
|                                                                                                                  | O11                      | Pre-existing hypertensive disorder with superimposed proteinuria                     |
|                                                                                                                  | O12                      | Gestational [pregnancy-induced] oedema and proteinuria without hypertension          |
|                                                                                                                  | O13                      | Gestational [pregnancy-induced] hypertension without significant proteinuria         |
|                                                                                                                  | O14                      | Gestational [pregnancy-induced] hypertension with significant proteinuria            |
|                                                                                                                  | O15                      | Eclampsia                                                                            |
|                                                                                                                  | O16                      | Unspecified maternal hypertension                                                    |
| Haemorrhage of pregnancy and childbirth (A117)                                                                   | O20                      | Haemorrhage in early pregnancy                                                       |
|                                                                                                                  | O43                      | Placental disorders                                                                  |
|                                                                                                                  | O44                      | Placenta praevia                                                                     |
|                                                                                                                  | O45                      | Premature separation of placenta [abruptio placentae]                                |
|                                                                                                                  | O46                      | Antepartum haemorrhage, not elsewhere classified                                     |
|                                                                                                                  | O67                      | Labour and delivery complicated by intrapartum haemorrhage, not elsewhere classified |
|                                                                                                                  | O72                      | Postpartum haemorrhage                                                               |
|                                                                                                                  | O73                      | Retained placenta and membranes, without haemorrhage                                 |
| Abortion with and without mention of sepsis or toxemia (A118 and A119)                                           | O03                      | Spontaneous abortion                                                                 |
|                                                                                                                  | O04                      | Medical abortion                                                                     |
|                                                                                                                  | O05                      | Other abortion                                                                       |
|                                                                                                                  | O06                      | Unspecified abortion                                                                 |
|                                                                                                                  | O07                      | Failed attempted abortion                                                            |
|                                                                                                                  | O08                      | Complications following abortion and ectopic and molar pregnancy                     |
| Other complications of pregnancy, childbirth and the puerperium. Delivery without mention of complication (A120) | O00                      | Ectopic pregnancy                                                                    |
|                                                                                                                  | O01                      | Hydatidiform mole                                                                    |
|                                                                                                                  | O02                      | Other abnormal products of conception                                                |
|                                                                                                                  | O21                      | Excessive vomiting in pregnancy                                                      |
|                                                                                                                  | O24                      | Diabetes mellitus in pregnancy                                                       |
|                                                                                                                  | O25                      | Malnutrition in pregnancy                                                            |
|                                                                                                                  | O26                      | Maternal care for other conditions predominantly related to pregnancy                |
|                                                                                                                  | O28                      | Abnormal findings on antenatal screening of mother                                   |
|                                                                                                                  | O29                      | Complications of anaesthesia during pregnancy                                        |
|                                                                                                                  | O30                      | Multiple gestation                                                                   |
|                                                                                                                  | O31                      | Complications specific to multiple gestation                                         |
|                                                                                                                  | O32                      | Maternal care for known or suspected malpresentation of fetus                        |
|                                                                                                                  | O33                      | Maternal care for known or suspected disproportion                                   |
|                                                                                                                  | O34                      | Maternal care for known or suspected abnormality of pelvic organs                    |
|                                                                                                                  | O35                      | Maternal care for known or suspected fetal abnormality and damage                    |
|                                                                                                                  | O36                      | Maternal care for other known or suspected fetal problems                            |
|                                                                                                                  | O40                      | Polyhydramnios                                                                       |
|                                                                                                                  | O41                      | Other disorders of amniotic fluid and membranes                                      |
|                                                                                                                  | O42                      | Premature rupture of membranes                                                       |
|                                                                                                                  | O47                      | False labour                                                                         |
|                                                                                                                  | O48                      | Prolonged pregnancy                                                                  |
|                                                                                                                  | O60                      | Preterm labour and delivery                                                          |
|                                                                                                                  | O61                      | Failed induction of labour                                                           |
|                                                                                                                  | O62                      | Abnormalities of forces of labour                                                    |
|                                                                                                                  | O63                      | Long labour                                                                          |
|                                                                                                                  | O64                      | Obstructed labour due to malposition and malpresentation of fetus                    |
|                                                                                                                  | O65                      | Obstructed labour due to maternal pelvic abnormality                                 |
|                                                                                                                  | O66                      | Other obstructed labour                                                              |
|                                                                                                                  | O68                      | Labour and delivery complicated by fetal stress [distress]                           |
|                                                                                                                  | O69                      | Labour and delivery complicated by umbilical cord complications                      |
|                                                                                                                  | O70                      | Perineal laceration during delivery                                                  |
|                                                                                                                  | O71                      | Other obstetric trauma                                                               |
|                                                                                                                  | O74                      | Complications of anaesthesia during labour and delivery                              |
|                                                                                                                  | O75                      | Other complications of labour and delivery, not elsewhere classified                 |

† Group names are based on the content of the ICD-7, list A (Intermediate list of 150 causes for tabulation of morbidity and mortality).

**Table S5.** International Classification of Diseases (ICD) 10<sup>th</sup> version for classifying maternal death causes in Chile. Homologation with five groups from ICD 7<sup>th</sup> version, list A.

(Table S5, continued)

| Group List A<br>ICD-7†                                                                                                          | ICD-10<br>(1997-present) | Causes of death                                                                                                             |
|---------------------------------------------------------------------------------------------------------------------------------|--------------------------|-----------------------------------------------------------------------------------------------------------------------------|
| Other complications<br>of pregnancy,<br>childbirth and the<br>puerperium. Delivery<br>without mention of<br>complication (A120) | O80                      | Single spontaneous delivery                                                                                                 |
|                                                                                                                                 | O81                      | Single delivery by forceps and vacuum extractor                                                                             |
|                                                                                                                                 | O82                      | Single delivery by caesarean section                                                                                        |
|                                                                                                                                 | O83                      | Other assisted single delivery                                                                                              |
|                                                                                                                                 | O84                      | Multiple delivery                                                                                                           |
|                                                                                                                                 | O89                      | Complications of anaesthesia during the puerperium                                                                          |
|                                                                                                                                 | O90                      | Complications of the puerperium, not elsewhere classified                                                                   |
|                                                                                                                                 | O91                      | Infections of breast associated with childbirth                                                                             |
|                                                                                                                                 | O92                      | Other disorders of breast and lactation associated with childbirth                                                          |
|                                                                                                                                 | O94                      | Sequelae of complication of pregnancy, childbirth and the puerperium                                                        |
|                                                                                                                                 | O95                      | Obstetric death of unspecified cause                                                                                        |
|                                                                                                                                 | O96                      | Death from any obstetric cause occurring more than 42 days but less than one year after delivery                            |
|                                                                                                                                 | O97                      | Death from sequelae of direct obstetric causes                                                                              |
|                                                                                                                                 | O98                      | Maternal infectious and parasitic diseases classifiable elsewhere but complicating pregnancy, childbirth and the puerperium |
|                                                                                                                                 | O99                      | Other maternal diseases classifiable elsewhere but complicating pregnancy, childbirth and the puerperium                    |

† Group names are based on the content of the ICD-7, list A (Intermediate list of 150 causes for tabulation of morbidity and mortality).
