# Supplementary material for: Women's Education Level, Maternal Health Facilities, Abortion Legislation and Maternal Deaths: A Natural Experiment in Chile from 1957 to 2007
Source: PLOS journal article supplement (doi:10.1371/journal.pone.0036613), 2012-05-04
Supplement: S14 (10.1371/journal.pone.0036613.s014) [file journal.pone.0036613.s014]

**Table S8.** Abortion hospitalizations in Chile based on official data and estimated proportions for clinical spontaneous abortions and clandestine induced abortions for the period 2001-2008. During this period, hospitalizations from clandestine abortion complications are estimated between 12% and 19% out of total hospitalizations by abortion (calculated as the difference between expected hospitalizations by clinical spontaneous abortion and observed hospitalizations by abortion; for additional information, see Appendix S2).

| Year | Observed Live Births <sup>†</sup> | Observed Abortion hospitalizations <sup>a</sup> | Ratio | Expected clinical spontaneous abortions <sup>b</sup> | Excess in abortion hospitalizations <sup>‡</sup> | Percent (%) <sup>c</sup> |
|------|-----------------------------------|-------------------------------------------------|-------|------------------------------------------------------|--------------------------------------------------|--------------------------|
| 2001 | 248,651                           | 34,479                                          | 7,1   | 29,238                                               | 5,241                                            | 15,2                     |
| 2002 | 241,027                           | 34,968                                          | 6,8   | 28,380                                               | 6,588                                            | 18,8                     |
| 2003 | 236,223                           | 33,490                                          | 7,0   | 27,856                                               | 5,634                                            | 16,8                     |
| 2004 | 232,588                           | 33,835                                          | 6,8   | 27,365                                               | 6,470                                            | 19,1                     |
| 2005 | 232,092                           | 33,184                                          | 7,0   | 27,422                                               | 5,762                                            | 17,4                     |
| 2006 | 233,104                           | 33,145                                          | 7,0   | 27,488                                               | 5,657                                            | 17,1                     |
| 2007 | 242,054                           | 32,532                                          | 7,4   | 28,579                                               | 3,953                                            | 12,2                     |
| 2008 | 246,581                           | 33,428                                          | 7,4   | 29,293                                               | 4,135                                            | 12,4                     |

<sup>†</sup>Based on data of observed live births (uncorrected) by the Chilean National Institute of Statistics, INE (2010) "Estadísticas Vitales, Informe Anual 2008". <sup>a</sup> Official number published by the Ministry of Health. Ratio refers to live births/abortions hospitalizations ratio. <sup>b</sup> Estimated applying the probabilities of the study by Wang *et al.* (2003) "Conception, early pregnancy loss, and time to clinical pregnancy: a population-based prospective study." Fertil Steril 79(3): 577. <sup>‡</sup>Estimated as the difference between observed and expected hospitalizations from abortion. <sup>c</sup> Estimated proportion of hospitalizations possibly related to induced abortions.
