# Supplementary material for: Women's Education Level, Maternal Health Facilities, Abortion Legislation and Maternal Deaths: A Natural Experiment in Chile from 1957 to 2007
Source: PLoS One. 2012 May 4;7(5):e36613. doi: 10.1371/journal.pone.0036613 (PMC3344918; doi:10.1371/journal.pone.0036613)
Supplement: Table S1 — International Classification of Diseases (ICD) 7th–10th versions for classifying maternal death causes in Chile. The groups for homologation were selected from ICD 7th version, list A. (PDF) [file pone.0036613.s007.pdf]

**Table S1.** International Classification of Diseases (ICD) 7th-10th versions for classifying maternal death causes in Chile. The groups for homologation were selected from ICD 7th version, list A.

| Group†                                                                            | Group List A ICD-7                                                                                               | ICD-7‡<br>(1957-1967)                     | ICD-8<br>(1968-1979)                           | ICD-9<br>(1980-1996)                                     | ICD-10 (1997-<br>present)                                                                                                  |
|-----------------------------------------------------------------------------------|------------------------------------------------------------------------------------------------------------------|-------------------------------------------|------------------------------------------------|----------------------------------------------------------|----------------------------------------------------------------------------------------------------------------------------|
| Sepsis                                                                            | Sepsis of pregnancy, childbirth and the puerperium (A115)                                                        | 640, 641, 681, 682, 684                   | 670, 671, 673                                  | 670, 671, 673                                            | O22, O23, O85 - O88                                                                                                        |
| Hypertension, eclampsia, toxae-mias                                               | Toxae-mias of pregnancy and the puerperium (A116)                                                                | 642, 652, 685, 686                        | 636 - 639                                      | 642                                                      | O10 - O16                                                                                                                  |
| Haemorrhage                                                                       | Haemorrhage of pregnancy and childbirth (A117)                                                                   | 643, 644, 670 - 672                       | 632, 651 - 653                                 | 640, 641, 666, 667                                       | O20, O43 - O46, O67, O72, O73                                                                                              |
| Abortion                                                                          | Abortion with and without mention of sepsis or toxae-mia (A118 and A119)                                         | 650, 651                                  | 640 - 645                                      | 632, 634 - 639                                           | O03 - O08                                                                                                                  |
| Other direct and indirect obstetric causes of death (including ectopic pregnancy) | Other complications of pregnancy, childbirth and the puerperium. Delivery without mention of complication (A120) | 645 - 649, 660, 673 - 680, 683, 687 - 689 | 630, 631 633 - 635 650 654 - 662 672 674 - 678 | 630, 631, 633 643 - 648 650 - 665 668, 669 672 674 - 677 | O00 - O02, O21, O24 - O26, O28 - O36, O40 - O42, O47, O48, O60 - O66, O68 - O71, O74, O75, O80 - O84, O89 - O92, O94 - O99 |

† Group names are based on the content of the ICD-7, list A (Intermediate list of 150 causes for tabulation of morbidity and mortality).

‡ During 1957 the ICD-6 was used in Chile, but maternal causes of death were directly homologated with the ICD-7.
